# Supplementary material for: A cross-sectional comparative study of gut bacterial community of Indian and Finnish children
Source: PubMed Central journal article supplement (PMC5585376; doi:10.1038/s41598-017-11215-y), 2017-09-05
Supplement: 41598_2017_11215_MOESM1_ESM.pdf [file 41598_2017_11215_MOESM1_ESM.pdf]

## **A cross-sectional comparative study of gut bacterial community of Indian and Finnish children**

Shreyas V. Kumbhare<sup>1,2†</sup>, Himanshu Kumar<sup>3†</sup>, Somak P. Chowdhury<sup>2,4</sup>, Dhiraj P. Dhotre<sup>2</sup>, Akihito Endo<sup>5</sup>, Jaana Mättö<sup>6</sup>, Arthur C. Ouwenhand<sup>7</sup>, Samuli Rautava<sup>3,8</sup>, Ruchi Joshi<sup>9</sup>, Nitinkumar P. Patil<sup>10</sup>, Ravindra H. Patil<sup>1</sup>, Erika Isolauri<sup>8</sup>, Ashish R. Bavdekar<sup>9</sup>, Seppo Salminen<sup>\*3</sup>, Yogesh S. Shouche<sup>\*2</sup>

### **Affiliations:**

<sup>1</sup>Department of Microbiology, R.C. Patel Arts, Science, and Commerce College, Shirpur, Dist. Dhule, Maharashtra, India, 425405.

<sup>2</sup>National Centre for Cell Science, Savitribai Phule University of Pune campus, Ganeshkhind, Pune, Maharashtra, India, 411007.

<sup>3</sup>Functional Foods Forum, Faculty of medicine, University of Turku, Turku, Finland, 20520.

<sup>4</sup>Max Planck Institute for Biogeochemistry, Jena, Germany - 07747

<sup>5</sup>Department of Food and Cosmetic Science, Tokyo University of Agriculture, Hokkaido, Japan.

<sup>6</sup>Finnish Red Cross Blood Service, Helsinki, Kivihaantie 7, Finland, 00310.

<sup>7</sup>Active Nutrition, DuPont Nutrition & Health, Kantvik, Finland, 02460.

<sup>8</sup>Department of Paediatrics, University of Turku, Turku, Finland, 20520.

<sup>9</sup>King Edward Memorial hospital research centre, Pune, Maharashtra, India 411011.

<sup>10</sup>Department of Microbiology, Smt. Chandibai Himathmal Mansukhani College, Ulhasnagar, Thane, Maharashtra, India, 421003.

\*Correspondence and requests for materials should be addressed to Y.S.S. (email:

[yogesh@nccs.res.in](mailto:yogesh@nccs.res.in)) or S.S. (email: [sepsal@utu.fi](mailto:sepsal@utu.fi))

### **Supplementary material:**

Figures: 6 (Figure S1-S6)

Tables: 5 (Table S1-S5)

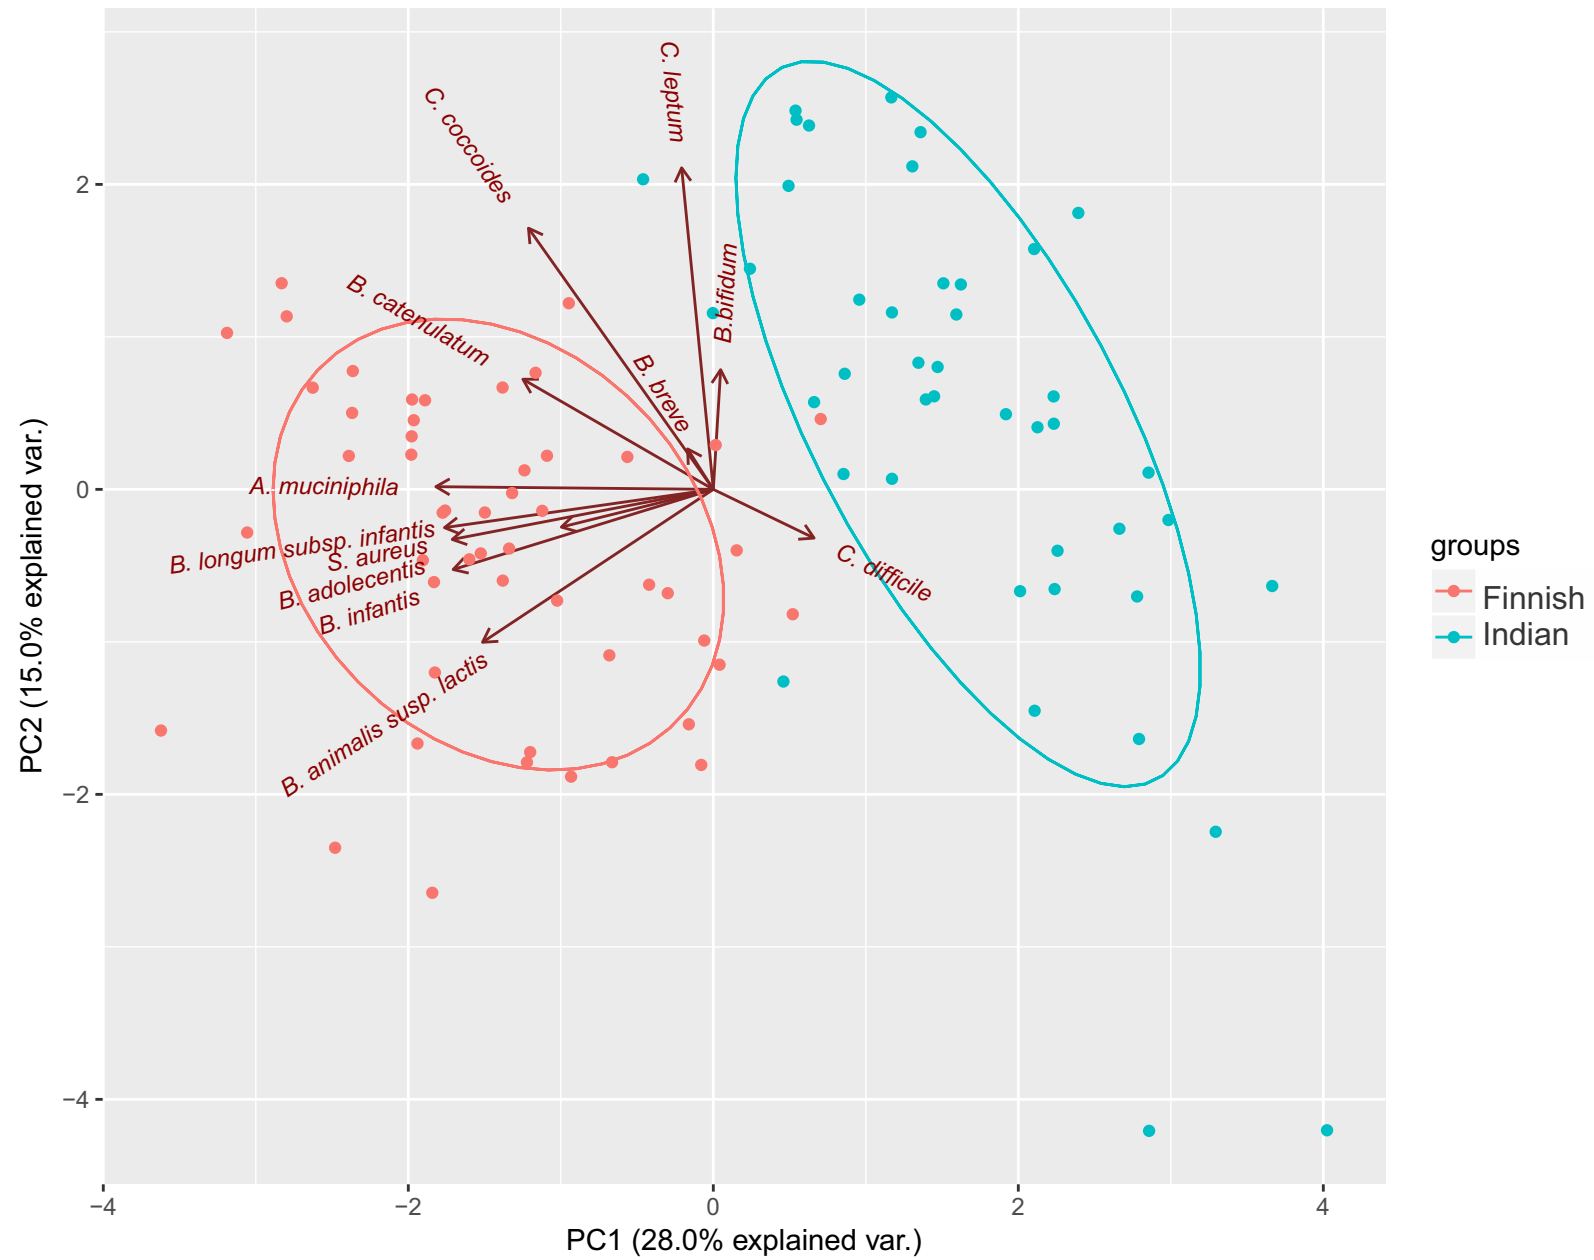

**Supplementary Figure S1.** Principal Component Analysis (PCA) illustrating the differences in abundances of different bacterial taxa and their contribution as components to explain the variation amongst Finnish (Red) and Indian children (Blue).

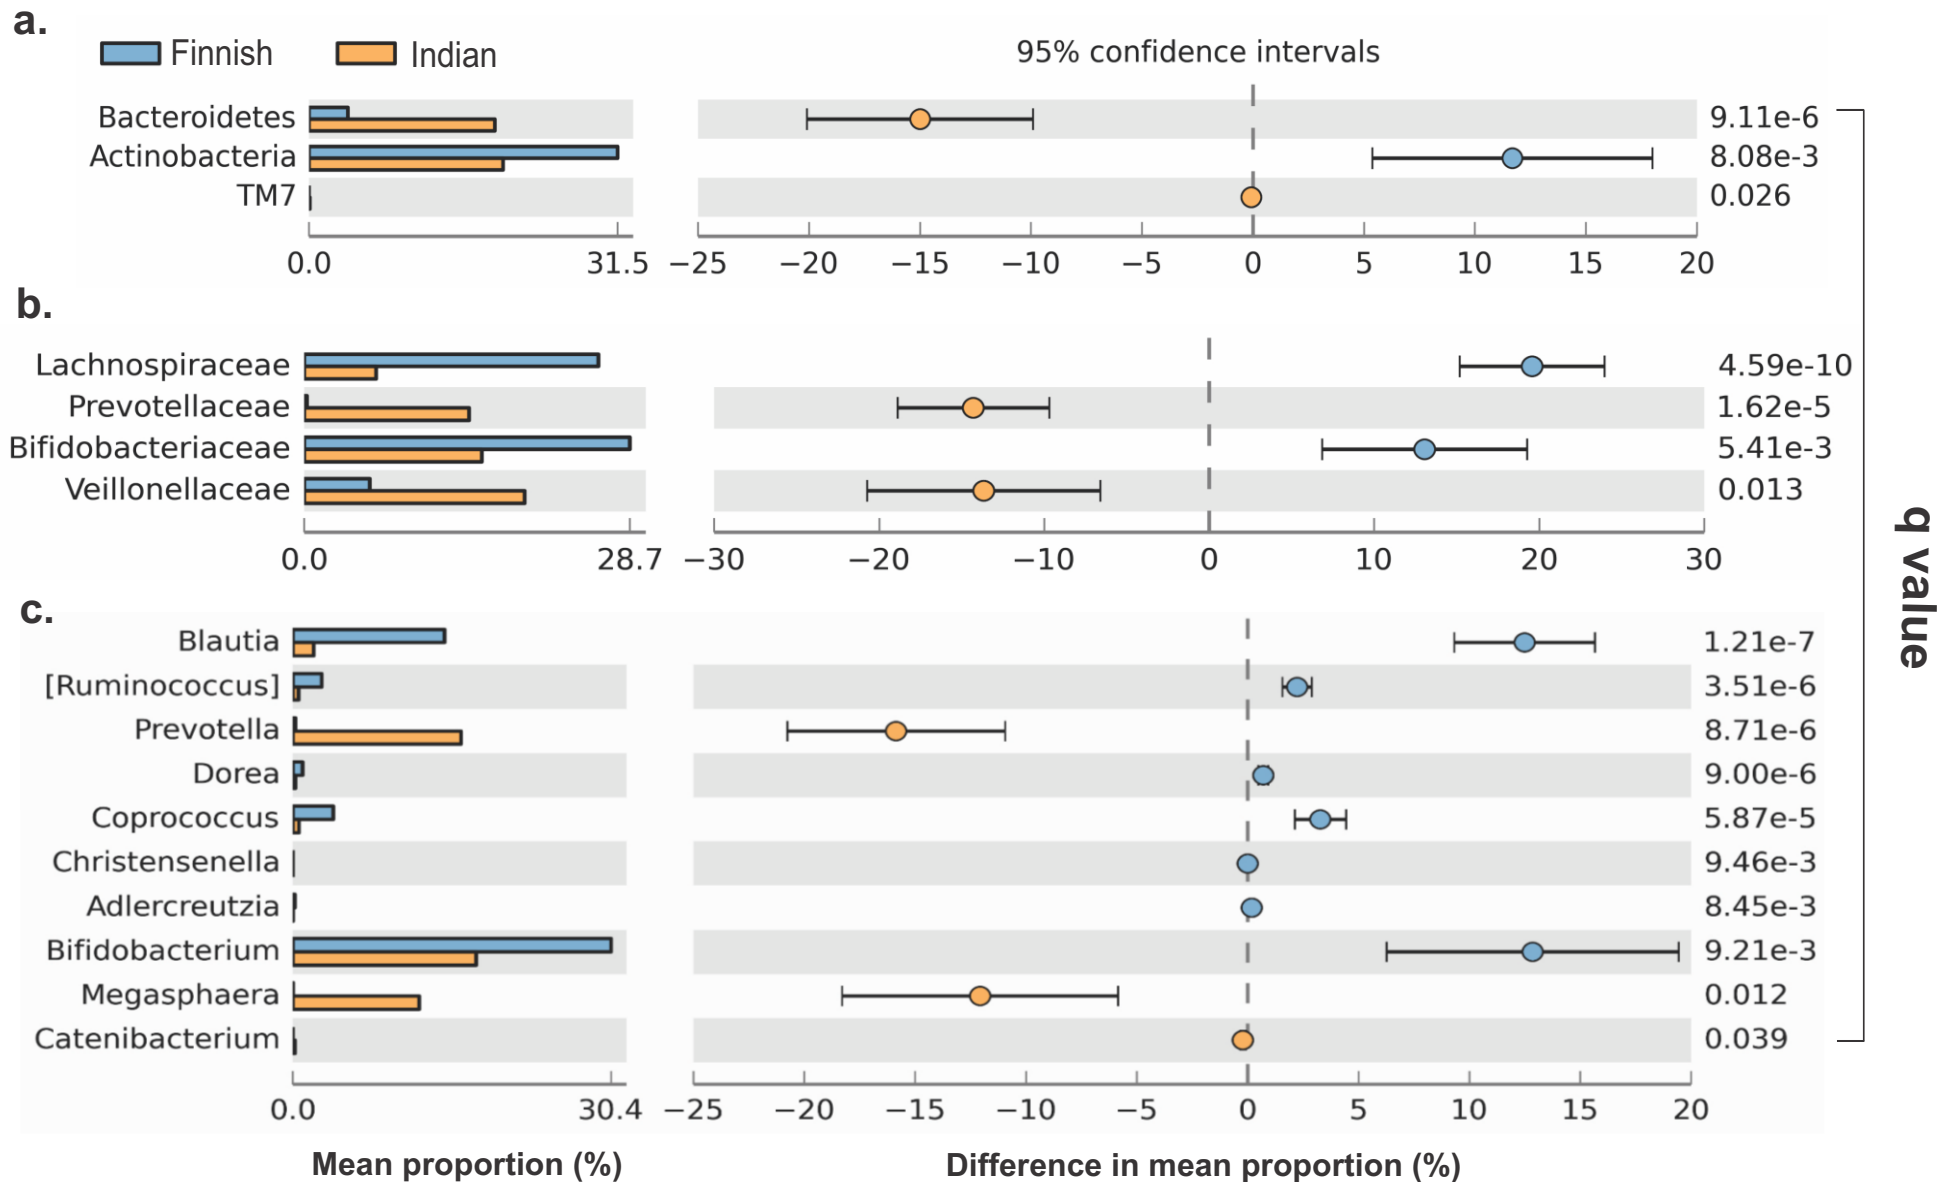

**Supplementary Figure S2. Differences in bacterial composition between Indian and Finnish children (a)** Extended bar plot exhibiting the differential abundances of bacterial phyla between Finnish (n=41) and Indian (n=42) children. **(b)** Extended bar plot exhibiting the differential abundances of bacterial families between Finnish (n=41) and Indian (n=42) children. **(c)** Extended bar plot exhibiting the differential abundances of bacterial genera between Finnish (n=41) and Indian (n=42) children.

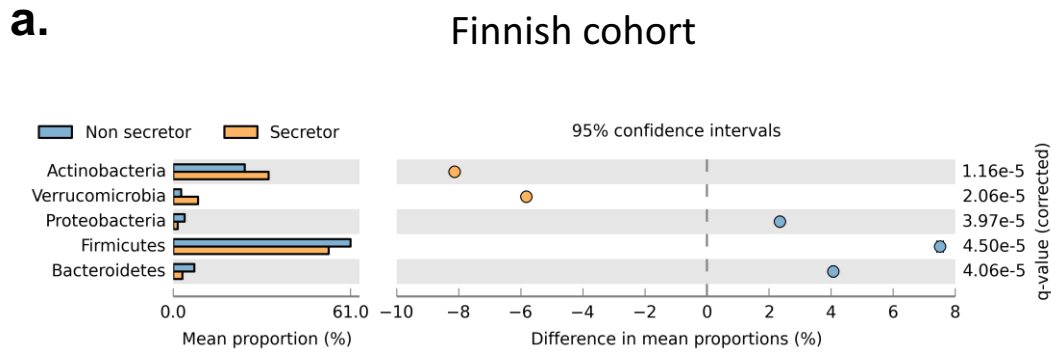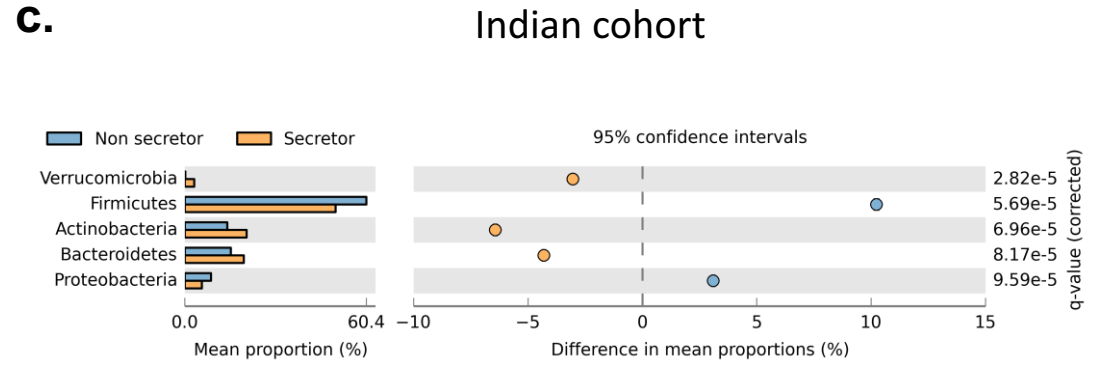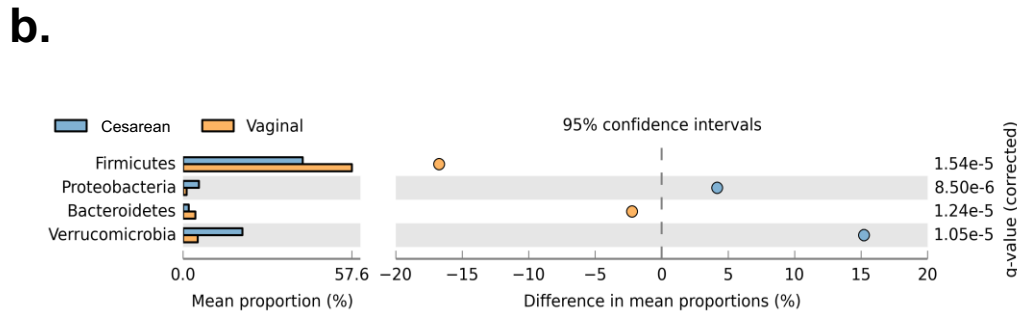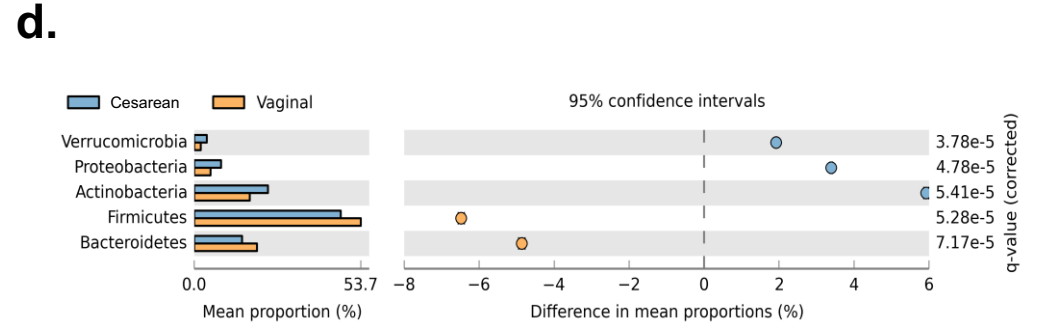

**Supplementary Figure S3. Influence of *FUT2* secretor status and birth mode on various bacterial phyla (a & b) Extended bar plots representing significantly different bacterial groups at Phylum level within Finnish population (c & d) Extended bar plots representing significantly different bacterial groups at Phylum level within Indian population. Appropriate effect size filter was employed to represent highly affected groups.**

## Finnish cohort

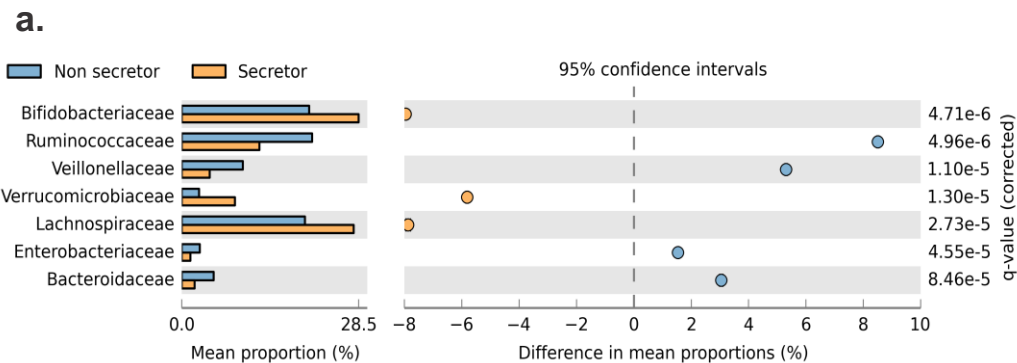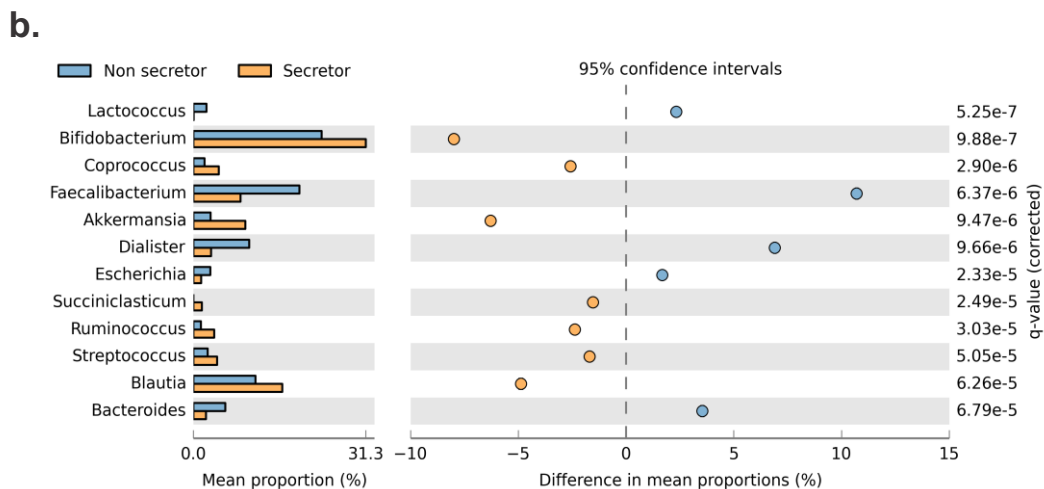

## Indian cohort

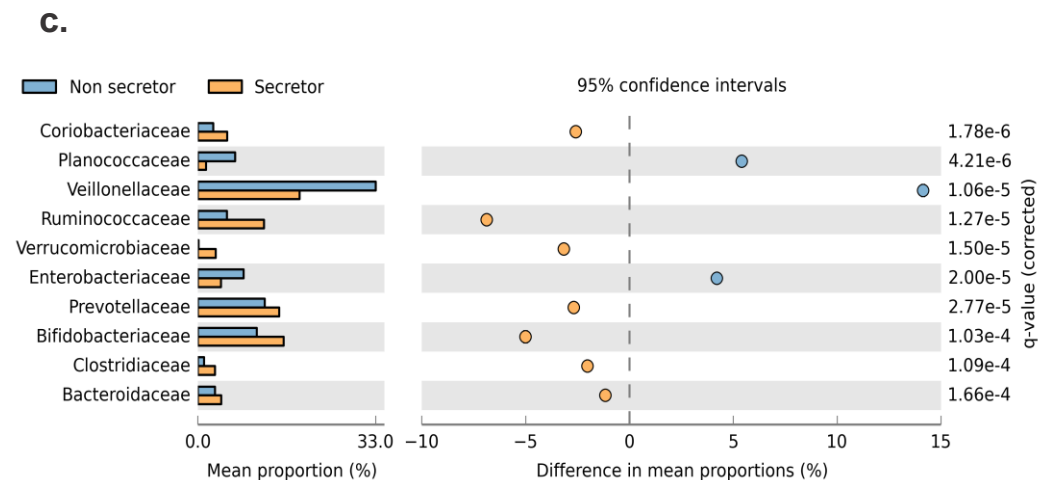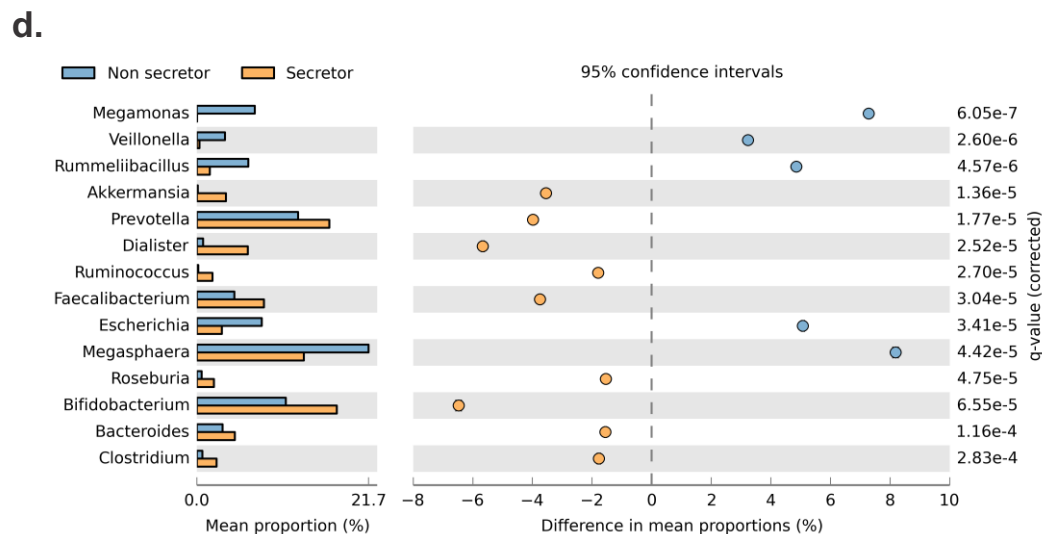

**Supplementary Figure S4. Effect of FUT2 secretor status on gut bacterial composition (a & b)** Extended bar plots representing significantly different bacterial groups at Family and Genus level respectively, between Finnish Secretor and Non-secretor children. **(c & d)** Extended bar plots representing significantly different bacterial groups at Family and Genus level respectively, between Indian Secretor and Non-secretor children. Effect size filter (>1.00%) was applied on the difference in mean proportions to obtain bacterial groups which are affected most amongst the total significantly different groups between Secretor and Non-secretor children.

## Finnish cohort

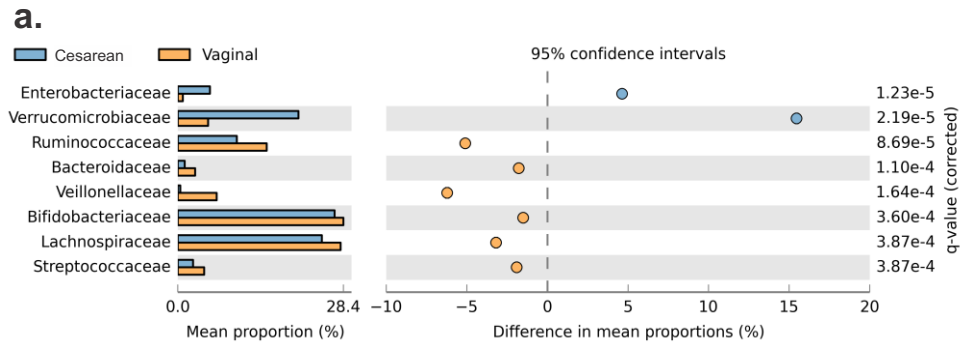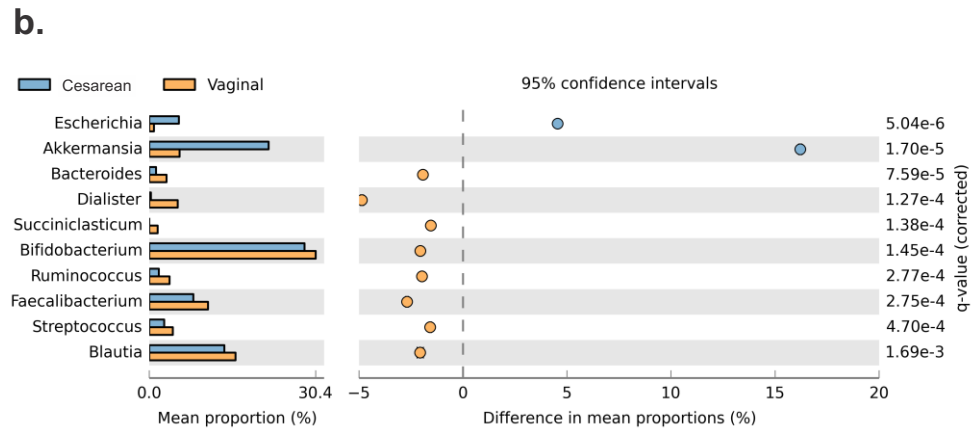

## Indian cohort

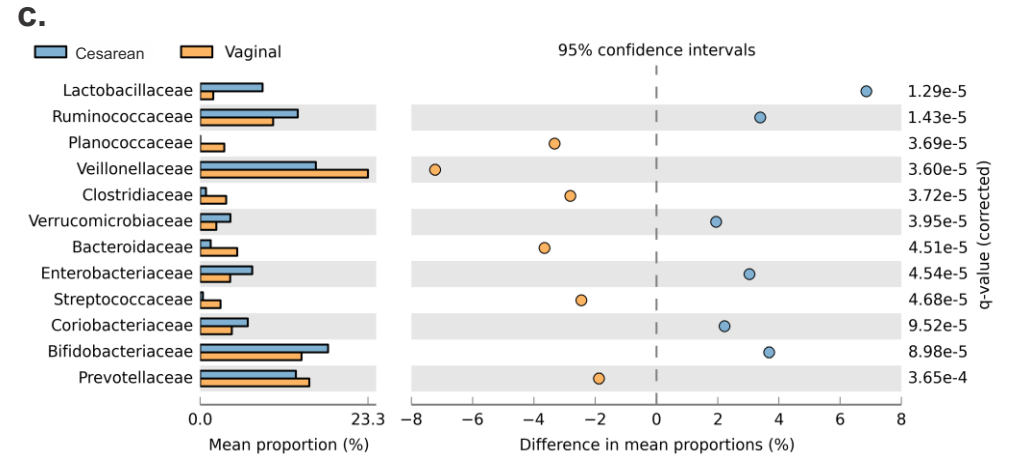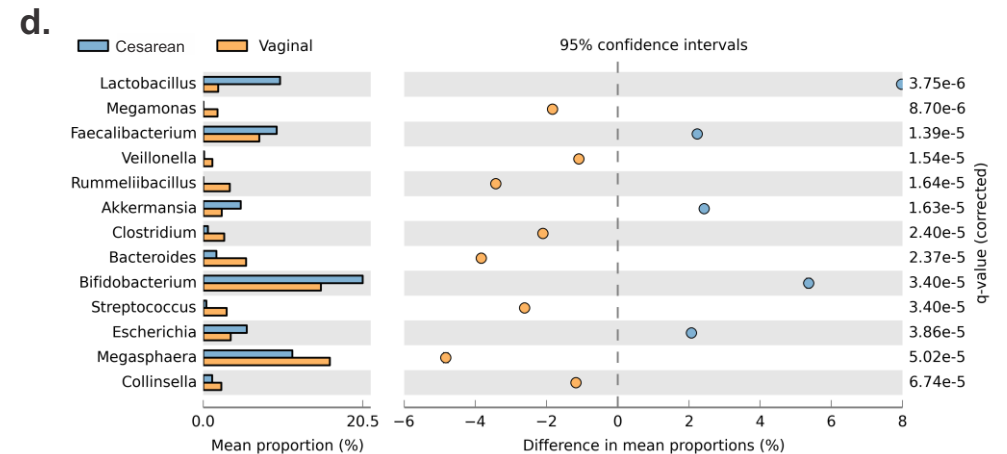

**Supplementary Figure S5. Effect of birth mode on gut bacterial composition (a & b)** Extended bar plots representing significantly different bacterial groups at Family and Genus level respectively, between Finnish Vaginally born and Cesarean born children. **(c & d)** Extended bar plots representing significantly different bacterial groups at Family and Genus level respectively, between Indian Vaginally born and Cesarean born children. Effect size filter (>1.00%) was applied on the difference in mean proportions to obtain bacterial groups which are affected most amongst the total significantly different groups between children with Vaginal and Cesarean birth mode.

■ Finnish ■ Indian

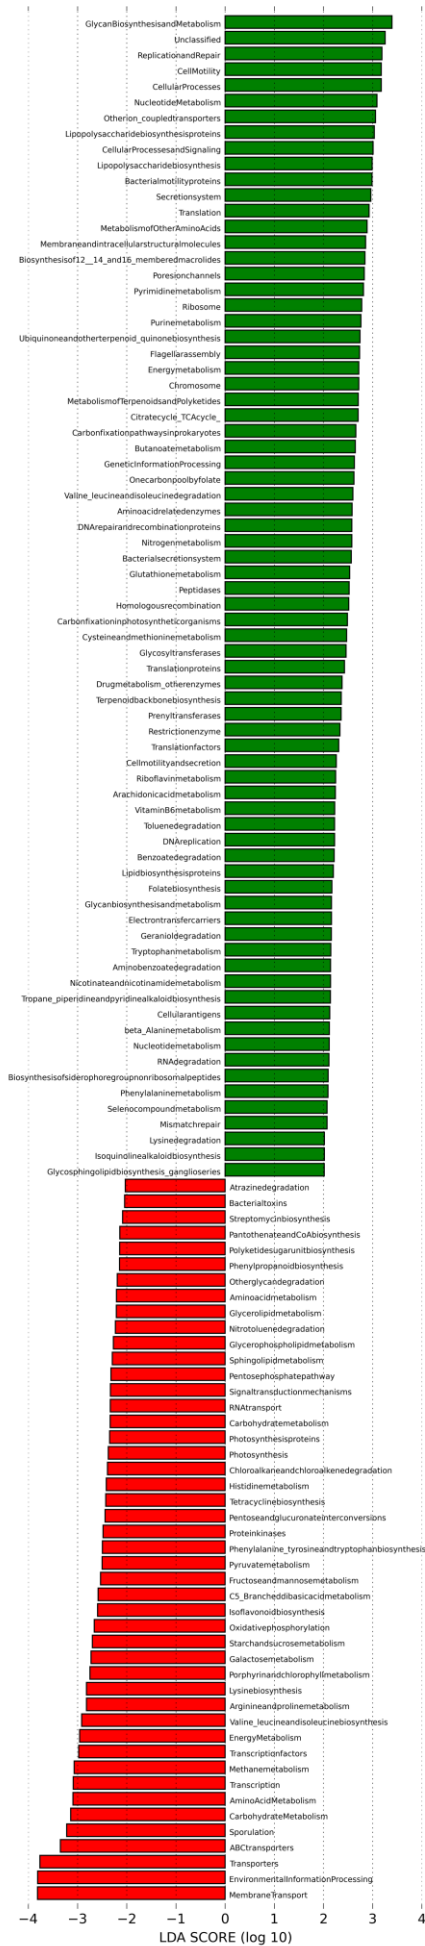

**Supplementary Figure S6. Differences in imputed metabolic functions.** The figure illustrates differential abundance of metabolic functions of the gut bacterial community analyzed using LefSe based on the KEGG orthologs obtained from PICRUSt.

| Target organism                                      | Primers                    | Sequence from 5' to 3'    | Product length (bp) | Reference             |
|------------------------------------------------------|----------------------------|---------------------------|---------------------|-----------------------|
| <i>Bifidobacterium</i> genus                         | Bifido5'                   | GATTCTGGCTCAGGATGAACGC    | 552                 | Gueimonde et al. 2004 |
|                                                      | Bifido3'                   | CTGATAGGACGCGACCCCAT      |                     |                       |
| <i>Bifidobacterium adolescentis</i>                  | Ado-Ang5'                  | GGATCGGCTGGAGCTTGCTCCG    | 279                 | Rinne et al. 2005     |
|                                                      | Ado3'                      | CCCCGAAGGCTTGCTCCAGT      |                     |                       |
| <i>Bifidobacterium bifidum</i>                       | Bifidum5'                  | TGACCGACCTGCCCCATGCT      | 278                 | Rinne et al. 2005     |
|                                                      | Bifidum3'                  | CCCATCCCACGCCGATAGAAT     |                     |                       |
| <i>Bifidobacterium breve</i>                         | Breve5'                    | AATGCCGGATGCTCCATCACAC    | 288                 | Rinne et al. 2005     |
|                                                      | Breve3'                    | GCCTTGCTCCCTAACAAAAGAGG   |                     |                       |
| <i>Bifidobacterium catenulatum</i> group             | Caten5'                    | GCCGGATGCTCCGACTCCT       | 285                 | Rinne et al. 2005     |
|                                                      | Caten3'                    | ACCCGAAGGCTTGCTCCCGAT     |                     |                       |
| <i>Bifidobacterium longum</i> subsp. <i>infantis</i> | BiINF-1                    | TTCCAGTTGATCGCATGGTC      | 828                 | Matsuki et al. 1999   |
|                                                      | BiINF-2                    | GGAAACCCCATCTCTGGGAT      |                     |                       |
| <i>Bifidobacterium animalis</i> subsp. <i>lactis</i> | Lactis5'                   | ACCAACTGCCTGTGCACCG       | 194                 | Rinne et al. 2005     |
|                                                      | Lactis3'                   | CCATCACCCGCCAACAAAGCT     |                     |                       |
| <i>Bifidobacterium longum</i> group                  | Longum5'                   | TTCCAGTTGATCGCATGGTCTTCT  | 831                 | Rinne et al. 2005     |
|                                                      | Longum3'                   | GGCTACCCGTCGAAGCCACG      |                     |                       |
| <i>Clostridium coccooides</i> group                  | g-Ccoc-F                   | AAATGACGGTACCTGACTAA      | 440                 | Matsuki et al. 2002   |
|                                                      | g-Ccoc-R                   | CTTTGAGTTTCATTCTTGCGAA    |                     |                       |
| <i>Clostridium difficile</i>                         | Cdif-F                     | TTGAGCGATTACTTCGGTAAAGA   | 89                  | Penders et al. 2005   |
|                                                      | Cdif-R                     | TGTACTGGCTCACCTTTGATATTYA |                     |                       |
| <i>Clostridium leptum</i> subgroup                   | sg-Clept-F                 | GCACAAGCAGTGGAGT          | 239                 | Matsuki et al. 2004   |
|                                                      | sg-Clept-R3                | CTTCCTCCGTTTTGTACC        |                     |                       |
| <i>Clostridium perfringens</i>                       | CPerf165F                  | CGCATAAYGTTGAAAGATGG      | 105                 | Wise & Siragusa 2005  |
|                                                      | CPerf269R                  | CCTTGGTAGGCCGTTACCC       |                     |                       |
| <i>Staphylococcus aureus</i> <i>muc</i> gene         | NUC1                       | GCGATTGATGGTGATACGGTT     | 270                 | Brakstad et al. 1992  |
|                                                      | NUC2                       | AGCCAAGCCTTGACGAACTAA AGC |                     |                       |
| <i>Akkremansia muciniphila</i>                       | S-St-Muc-1129-a-a-20 (AM1) | CAGCACGTGAAGGTGGGGAC      | 308                 | Collado et al. 2007   |
|                                                      | S-St-Muc-1437-a-A-20 (AM2) | CCTTGC GGTTGGCTTCAGAT     |                     |                       |

**Supplementary Table S1.** Quantification of bacterial groups. The table above describes list of bacteria that were quantified using respective primer sets with qPCR method.



---

| Sr. No. | Bacterial strains used                                          |
|---------|-----------------------------------------------------------------|
| 1.      | <i>Bacteroides fragilis</i> DSM 2151                            |
| 2.      | <i>Lactobacillus gasseri</i> DSM 20243                          |
| 3.      | <i>Leuconostoc mesenteroides subsp. mesenteroides</i> DSM 20343 |
| 4.      | <i>Lactobacillus salivarius</i> DSM 20555                       |
| 5.      | <i>Bifidobacterium breve</i> DSM 20213                          |
| 6.      | <i>Bifidobacterium longum</i> DSM 20219                         |
| 7.      | <i>Bifidobacterium bifidum</i> DSM 20456                        |
| 8.      | <i>Bifidobacterium angulatum</i> JCM 7096                       |

---

**Supplementary Table S2.** List of Bacterial strains used as reference standards for total bacterial diversity analysis using DGGE. Total genomic DNA from the mentioned strains was isolated and used further for PCR-DGGE analysis.

| Comparison          | Cohort           | Chao1<br>(Mean± SD) | Observed species<br>(Mean± SD) | Shannon<br>(Mean± SD) | Simpson<br>(Mean± SD) | Simpson reciprocal<br>(Mean± SD) |
|---------------------|------------------|---------------------|--------------------------------|-----------------------|-----------------------|----------------------------------|
| 1. Country          | Finnish (n = 41) | 2599± 582.5         | 1792± 414.4                    | 6.014± 0.9485         | 0.9297± 0.05          | 21.9± 14.73                      |
|                     | Indian (n = 42)  | 2300± 604.5         | 1499± 449                      | 5.481± 0.8319         | 0.9164± 0.05          | 16.28± 8.577                     |
|                     | P-value          | 0.0674              | 0.0059                         | 0.0135                | 0.1                   | 0.1                              |
| 2. Secretor status* | FS               | 7997± 165.1         | 6056± 14.15                    | 7.261± 0.001          | 0.9742± 3.3E-05       | 38.77± 0.05                      |
|                     | FNS              | 7741± 0.0           | 5925± 0.0                      | 7.574± 0.0            | 0.9796± 0.0           | 49.12± 0.0                       |
|                     | P-value          | 0.1                 | 0.1                            | 0.1                   | 0.1                   | 0.1                              |
|                     | IS               | 9025± 66.38         | 6779± 25.74                    | 7.554± 0.001          | 0.9827± 8.54E-06      | 57.8± 0.02                       |
|                     | INS              | 7783± 0.0           | 5739± 0.0                      | 6.835± 0.0            | 0.9728± 0.0           | 36.79± 0.0                       |
|                     | P-value          | 0.1                 | 0.1                            | 0.1                   | 0.1                   | 0.1                              |
| 3. Birth Mode*      | FV               | 8636± 179.6         | 6503± 23.12                    | 7.46± 0.004           | 0.9768± 3.49E-05      | 43.14± 0.06                      |
|                     | FC               | 6039± 0.0           | 4824± 0.0                      | 6.629± 0.0            | 0.9585± 0.0           | 24.11± 0.0                       |
|                     | P-value          | 0.1                 | 0.1                            | 0.1                   | 0.1                   | 0.1                              |
|                     | IV               | 10094± 182.2        | 7771± 22.59                    | 7.493± 0.001          | 0.9814± 1.39E-05      | 53.76± 0.04                      |
|                     | IC               | 8179± 0.0           | 6511± 0.0                      | 7.273± 0.0            | 0.9812± 0.0           | 53.25± 0.0                       |
|                     | P-value          | 0.1                 | 0.1                            | 0.1                   | 0.1                   | 0.1                              |

**Supplementary Table S3.** Alpha diversity analysis. The table describes comparison of bacterial community within different study groups using various alpha diversity indices. \* mark indicates that the analysis was carried out on the rarified consolidated data for comparison between secretor status and birth mode groups within Indian and Finnish population. P- value was calculated using Mann-Whitney U-test. Abbreviations: FS-Finnish Secretors, FNS- Finnish Non-Secretors, IS-Indian Secretors, INS- Indian Non-Secretors, FV- Finnish Vaginal, FC- Finnish Cesarian, IV- Indian Vaginal, IC- Indian Cesarian.

**a.**

| Phylum                 | Indian | Finnish | P-value    |
|------------------------|--------|---------|------------|
| <i>Acidobacteria</i>   | 69.05% | 46.34%  | 0.03675928 |
| <i>Chloroflexi</i>     | 92.86% | 68.29%  | 0.00474412 |
| <i>Deferribacteres</i> | 16.67% | 2.44%   | 0.02816974 |
| <i>Fusobacteria</i>    | 88.10% | 46.34%  | 3.1612E-05 |
| <i>Lentisphaerae</i>   | 28.57% | 7.32%   | 0.01144027 |
| <i>Thermi</i>          | 97.62% | 68.29%  | 0.00041543 |

**b.**

| Family                       | Indian  | Finnish | P-Value     |
|------------------------------|---------|---------|-------------|
| <i>Aerococcaceae</i>         | 80.95%  | 39.02%  | 5.85191E-05 |
| <i>Alcaligenaceae</i>        | 97.62%  | 82.93%  | 0.025897635 |
| <i>Alcanivoracaceae</i>      | 47.62%  | 24.39%  | 0.027455198 |
| <i>Bacillaceae</i>           | 73.81%  | 34.15%  | 0.000197988 |
| <i>Chitinophagaceae</i>      | 59.52%  | 21.95%  | 0.000360808 |
| <i>Comamonadaceae</i>        | 83.33%  | 51.22%  | 0.001625269 |
| <i>Deferribacteraceae</i>    | 16.67%  | 2.44%   | 0.028169735 |
| <i>Dietziaceae</i>           | 0.00%   | 9.76%   | 0.044025001 |
| <i>Eubacteriaceae</i>        | 14.29%  | 78.05%  | 9.46953E-11 |
| <i>F16</i>                   | 47.62%  | 9.76%   | 9.26366E-05 |
| <i>Fusobacteriaceae</i>      | 85.71%  | 34.15%  | 4.15408E-07 |
| <i>Gemellaceae</i>           | 88.10%  | 68.29%  | 0.029747723 |
| <i>Geobacteraceae</i>        | 9.52%   | 0.00%   | 0.044064044 |
| <i>Idiomarinaceae</i>        | 35.71%  | 4.88%   | 0.000413541 |
| <i>Leptotrichiaceae</i>      | 40.48%  | 17.07%  | 0.018263959 |
| <i>Leuconostocaceae</i>      | 78.57%  | 56.10%  | 0.029458408 |
| <i>Micrococcaceae</i>        | 95.24%  | 73.17%  | 0.006141834 |
| <i>mitochondria</i>          | 80.95%  | 43.90%  | 0.000378757 |
| <i>Moraxellaceae</i>         | 100.00% | 82.93%  | 0.006533611 |
| <i>Neisseriaceae</i>         | 100.00% | 63.41%  | 2.20749E-05 |
| <i>Nocardiaceae</i>          | 42.86%  | 19.51%  | 0.021497415 |
| <i>Oxalobacteraceae</i>      | 83.33%  | 53.66%  | 0.003386777 |
| <i>Paraprevotellaceae</i>    | 95.24%  | 58.54%  | 6.41572E-05 |
| <i>Pasteurellaceae</i>       | 100.00% | 90.24%  | 0.044025001 |
| <i>Peptostreptococcaceae</i> | 76.19%  | 92.68%  | 0.038691969 |
| <i>Planctomycetaceae</i>     | 33.33%  | 9.76%   | 0.008687756 |
| <i>Planococcaceae</i>        | 78.57%  | 39.02%  | 0.000173953 |
| <i>Pseudomonadaceae</i>      | 80.95%  | 48.78%  | 0.001911265 |
| <i>Rhizobiaceae</i>          | 38.10%  | 9.76%   | 0.002231553 |
| <i>Rhodobacteraceae</i>      | 73.81%  | 41.46%  | 0.002558446 |
| <i>Rs-045</i>                | 47.62%  | 4.88%   | 5.532E-06   |
| <i>Saprospiraceae</i>        | 9.52%   | 0.00%   | 0.044064044 |
| <i>Shewanellaceae</i>        | 92.86%  | 70.73%  | 0.009275119 |
| <i>Sphingomonadaceae</i>     | 45.24%  | 14.63%  | 0.002044714 |
| <i>Succinivibrionaceae</i>   | 85.71%  | 36.59%  | 1.49247E-06 |
| <i>Thermaceae</i>            | 97.62%  | 68.29%  | 0.000415427 |
| <i>Victivallaceae</i>        | 28.57%  | 7.32%   | 0.011440269 |
| <i>Xanthomonadaceae</i>      | 95.24%  | 73.17%  | 0.006141834 |

**Supplementary Table S4.** Prevalence analysis. The charts depict prevalence of different bacterial groups within two cohorts. P-values mentioned in the chart indicate significantly different prevalence patterns of the bacterial community between Indian (n=42) and Finnish (n=41) subjects (a) Prevalence chart of bacterial community at Phylum level (b) Prevalence chart of bacterial community at Family level (c) Prevalence chart of bacterial community at Genus level.

**c.**

| Genus                        | Indian  | Finnish | P-Value     |
|------------------------------|---------|---------|-------------|
| <i>Abiotrophia</i>           | 69.05%  | 24.39%  | 2.20651E-05 |
| <i>Acidaminococcus</i>       | 50.00%  | 0.00%   | 1.15533E-07 |
| <i>Acinetobacter</i>         | 100.00% | 70.73%  | 0.00021629  |
| <i>Actinobacillus</i>        | 45.24%  | 14.63%  | 0.002044714 |
| <i>Adlercreutzia</i>         | 61.90%  | 100.00% | 1.0415E-05  |
| <i>Alcanivorax</i>           | 47.62%  | 24.39%  | 0.027455198 |
| <i>Alloiococcus</i>          | 33.33%  | 14.63%  | 0.046582275 |
| <i>Alloscardovia</i>         | 0.00%   | 12.20%  | 0.02340471  |
| <i>Amaricoccus</i>           | 19.05%  | 0.00%   | 0.003435296 |
| <i>Anaerofustis</i>          | 7.14%   | 70.73%  | 1.13298E-10 |
| <i>Bacillus</i>              | 61.90%  | 31.71%  | 0.005420609 |
| <i>Butyricimonas</i>         | 78.57%  | 56.10%  | 0.029458408 |
| <i>Candidatus Rhodoluna</i>  | 0.00%   | 12.20%  | 0.02340471  |
| <i>Catenibacterium</i>       | 78.57%  | 9.76%   | 6.65051E-13 |
| <i>Christensenella</i>       | 21.43%  | 65.85%  | 2.28035E-05 |
| <i>Citrobacter</i>           | 66.67%  | 31.71%  | 0.001195446 |
| <i>Coprobacillus</i>         | 11.90%  | 58.54%  | 3.86312E-06 |
| <i>Eggerthella</i>           | 64.29%  | 90.24%  | 0.004480762 |
| <i>Enterococcus</i>          | 78.57%  | 56.10%  | 0.029458408 |
| <i>Epulopiscium</i>          | 2.38%   | 14.63%  | 0.048655328 |
| <i>Flavisolibacter</i>       | 42.86%  | 19.51%  | 0.021497415 |
| <i>Fusobacterium</i>         | 80.95%  | 21.95%  | 4.42471E-09 |
| <i>Geobacillus</i>           | 16.67%  | 2.44%   | 0.028169735 |
| <i>Geobacter</i>             | 9.52%   | 0.00%   | 0.044064044 |
| <i>Holdemania</i>            | 35.71%  | 68.29%  | 0.002626934 |
| <i>Kaistobacter</i>          | 14.29%  | 0.00%   | 0.012457479 |
| <i>Kocuria</i>               | 47.62%  | 19.51%  | 0.006276573 |
| <i>Lactococcus</i>           | 61.90%  | 90.24%  | 0.002231553 |
| <i>Lautropia</i>             | 26.19%  | 4.88%   | 0.007241058 |
| <i>Leptotrichia</i>          | 38.10%  | 14.63%  | 0.014975593 |
| <i>Luteimonas</i>            | 21.43%  | 2.44%   | 0.007738408 |
| <i>Megasphaera</i>           | 100.00% | 70.73%  | 0.00021629  |
| <i>Megasphaera</i>           | 100.00% | 53.66%  | 7.02607E-07 |
| <i>Meiothermus</i>           | 97.62%  | 60.98%  | 3.84327E-05 |
| <i>Micrococcus</i>           | 52.38%  | 29.27%  | 0.032313462 |
| <i>Mitsuokella</i>           | 71.43%  | 9.76%   | 3.5965E-10  |
| <i>Mucispirillum</i>         | 16.67%  | 2.44%   | 0.028169735 |
| <i>Neisseria</i>             | 97.62%  | 63.41%  | 8.75103E-05 |
| <i>Oribacterium</i>          | 42.86%  | 12.20%  | 0.001526647 |
| <i>Pantoea</i>               | 28.57%  | 7.32%   | 0.011440269 |
| <i>Paracoccus</i>            | 57.14%  | 29.27%  | 0.009950177 |
| <i>Phascolarctobacterium</i> | 100.00% | 90.24%  | 0.044025001 |
| <i>Planctomyces</i>          | 33.33%  | 9.76%   | 0.008687756 |
| <i>Porphyromonas</i>         | 88.10%  | 58.54%  | 0.002190427 |
| <i>Pseudoxanthomonas</i>     | 52.38%  | 12.20%  | 5.48243E-05 |
| <i>Psychrobacter</i>         | 57.14%  | 24.39%  | 0.002072842 |
| <i>Rhodanobacter</i>         | 90.48%  | 65.85%  | 0.006652075 |
| <i>Rhodococcus</i>           | 40.48%  | 19.51%  | 0.037400551 |
| <i>Rothia</i>                | 92.86%  | 65.85%  | 0.002352529 |
| <i>Rummeliibacillus</i>      | 59.52%  | 36.59%  | 0.03682443  |
| <i>Sarcina</i>               | 45.24%  | 2.44%   | 3.22834E-06 |
| <i>Scardovia</i>             | 85.71%  | 39.02%  | 4.87538E-06 |
| <i>Serratia</i>              | 35.71%  | 14.63%  | 0.026899275 |
| <i>Shewanella</i>            | 92.86%  | 70.73%  | 0.009275119 |
| <i>Shuttleworthia</i>        | 26.19%  | 0.00%   | 0.00045201  |
| <i>Slackia</i>               | 80.95%  | 29.27%  | 5.21671E-07 |
| <i>Sphingomonas</i>          | 30.95%  | 7.32%   | 0.005955728 |
| <i>Succinatimonas</i>        | 54.76%  | 24.39%  | 0.004258777 |
| <i>Succinivibrio</i>         | 61.90%  | 14.63%  | 3.41718E-06 |
| <i>Sutterella</i>            | 97.62%  | 80.49%  | 0.013599178 |
| <i>vadinCA11</i>             | 11.90%  | 0.00%   | 0.023454786 |

| #SampleID | Country | Sex    | Birth mode | Genotype | Description  | No. of assembled sequences (qvalue> 30) |
|-----------|---------|--------|------------|----------|--------------|-----------------------------------------|
| f104      | Finnish | Male   | Vaginal    | GG       | Secretor     | 254448                                  |
| f105      | Finnish | Male   | Vaginal    | AA       | Non secretor | 209688                                  |
| f109      | Finnish | Female | Vaginal    | AA       | Non secretor | 331404                                  |
| f117      | Finnish | Female | Vaginal    | AA       | Non secretor | 287106                                  |
| f118      | Finnish | Female | Vaginal    | GA       | Secretor     | 234702                                  |
| f121      | Finnish | Male   | Vaginal    | GG       | Secretor     | 284218                                  |
| f123      | Finnish | Female | Vaginal    | GG       | Secretor     | 251257                                  |
| f125      | Finnish | Female | Vaginal    | GA       | Secretor     | 253640                                  |
| f127      | Finnish | Female | Vaginal    | GA       | Secretor     | 233680                                  |
| f129      | Finnish | Male   | C section  | GG       | Secretor     | 249334                                  |
| f134      | Finnish | Male   | C section  | GG       | Secretor     | 296291                                  |
| f138      | Finnish | Female | Vaginal    | AA       | Non secretor | 344038                                  |
| f141      | Finnish | Male   | Vaginal    | GG       | Secretor     | 333455                                  |
| f143      | Finnish | Female | Vaginal    | GG       | Secretor     | 211524                                  |
| f146      | Finnish | Female | C section  | GA       | Secretor     | 299514                                  |
| f149      | Finnish | Male   | Vaginal    | GA       | Secretor     | 217066                                  |
| f154      | Finnish | Male   | Vaginal    | GG       | Secretor     | 354177                                  |
| f155      | Finnish | Male   | Vaginal    | GA       | Secretor     | 227492                                  |
| f158      | Finnish | Male   | Vaginal    | GA       | Secretor     | 195611                                  |
| f161      | Finnish | Female | Vaginal    | GA       | Secretor     | 184752                                  |
| f162      | Finnish | Male   | C section  | GG       | Secretor     | 332247                                  |
| f163      | Finnish | Male   | Vaginal    | AA       | Non secretor | 328651                                  |
| f164      | Finnish | Female | Vaginal    | GG       | Secretor     | 296484                                  |

|      |         |        |           |    |              |        |
|------|---------|--------|-----------|----|--------------|--------|
| f172 | Finnish | Female | Vaginal   | GG | Secretor     | 265710 |
| f176 | Finnish | Female | C section | GG | Secretor     | 239938 |
| f181 | Finnish | Male   | Vaginal   | GA | Secretor     | 200341 |
| f182 | Finnish | Male   | C section | GG | Secretor     | 200995 |
| f183 | Finnish | Male   | Vaginal   | GA | Secretor     | 261592 |
| f198 | Finnish | Male   | Vaginal   | GG | Secretor     | 220988 |
| f200 | Finnish | Male   | Vaginal   | GG | Secretor     | 274442 |
| f202 | Finnish | Male   | Vaginal   | AA | Non secretor | 223052 |
| f207 | Finnish | Female | Vaginal   | GA | Secretor     | 468711 |
| f209 | Finnish | Female | Vaginal   | GG | Secretor     | 538509 |
| f212 | Finnish | Female | Vaginal   | GG | Secretor     | 398343 |
| f218 | Finnish | Male   | Vaginal   | GA | Secretor     | 310761 |
| f227 | Finnish | Female | Vaginal   | GA | Secretor     | 448268 |
| f228 | Finnish | Female | Vaginal   | GA | Secretor     | 519704 |
| f231 | Finnish | Female | Vaginal   | AA | Non secretor | 419947 |
| f238 | Finnish | Male   | Vaginal   | GA | Secretor     | 493461 |
| f242 | Finnish | Male   | Vaginal   | GA | Secretor     | 524289 |
| f251 | Finnish | Female | C section | GA | Secretor     | 421609 |
| i01  | Indian  | Male   | Vaginal   | GA | Secretor     | 424473 |
| i02  | Indian  | Female | Vaginal   | AA | Non secretor | 483961 |
| i03  | Indian  | Male   | Vaginal   | GG | Secretor     | 322455 |
| i04  | Indian  | Male   | Vaginal   | AA | Non secretor | 208728 |
| i06  | Indian  | Male   | C section | GG | Secretor     | 201956 |
| i07  | Indian  | Female | C section | GG | Secretor     | 318893 |
| i08  | Indian  | Female | Vaginal   | GG | Secretor     | 364666 |
| i09  | Indian  | Female | Vaginal   | GG | Secretor     | 229713 |
| i10  | Indian  | Male   | Vaginal   | GA | Secretor     | 232140 |

|     |        |        |           |    |              |        |
|-----|--------|--------|-----------|----|--------------|--------|
| i12 | Indian | Female | Vaginal   | GG | Secretor     | 405863 |
| i16 | Indian | Male   | C section | GG | Secretor     | 275190 |
| i18 | Indian | Female | C section | GG | Secretor     | 221005 |
| i20 | Indian | Female | Vaginal   | GA | Secretor     | 222782 |
| i23 | Indian | Male   | Vaginal   | GG | Secretor     | 246660 |
| i24 | Indian | Male   | C section | GG | Secretor     | 265234 |
| i25 | Indian | Female | C section | GG | Secretor     | 205733 |
| i28 | Indian | Female | Vaginal   | GA | Secretor     | 222471 |
| i29 | Indian | Female | Vaginal   | GA | Secretor     | 221827 |
| i30 | Indian | Male   | Vaginal   | GG | Secretor     | 202441 |
| i31 | Indian | Female | Vaginal   | AA | Non secretor | 245464 |
| i32 | Indian | Female | Vaginal   | AA | Non secretor | 224905 |
| i33 | Indian | Female | Vaginal   | GA | Secretor     | 271300 |
| i34 | Indian | Female | C section | GG | Secretor     | 230294 |
| i39 | Indian | Male   | Vaginal   | GG | Secretor     | 741699 |
| i41 | Indian | Male   | Vaginal   | GG | Secretor     | 610929 |
| i43 | Indian | Male   | Vaginal   | GG | Secretor     | 164579 |
| i45 | Indian | Male   | Vaginal   | GA | Secretor     | 199151 |
| i46 | Indian | Female | Vaginal   | GG | Secretor     | 216431 |
| i47 | Indian | Male   | C section | GA | Secretor     | 175229 |
| i49 | Indian | Male   | Vaginal   | GG | Secretor     | 575204 |
| i50 | Indian | Female | Vaginal   | AA | Non secretor | 208067 |
| i51 | Indian | Female | C section | GA | Secretor     | 198928 |
| i52 | Indian | Male   | Vaginal   | AA | Non secretor | 407312 |
| i53 | Indian | Male   | Vaginal   | GA | Secretor     | 606248 |
| i54 | Indian | Male   | Vaginal   | GA | Secretor     | 485659 |
| i55 | Indian | Male   | Vaginal   | GA | Secretor     | 445029 |

|     |        |        |           |    |              |        |
|-----|--------|--------|-----------|----|--------------|--------|
| i56 | Indian | Male   | C section | GA | Secretor     | 481824 |
| i57 | Indian | Female | C section | GA | Secretor     | 498550 |
| i58 | Indian | Female | C section | GA | Secretor     | 298966 |
| i59 | Indian | Male   | C section | GG | Secretor     | 414983 |
| i60 | Indian | Male   | Vaginal   | GA | Secretor     | 462179 |
| i61 | Indian | Male   | Vaginal   | AA | Non secretor | 670301 |

**Supplementary Table S5.** Details of birth mode, *FUT2* genotype and number of good quality sequences assembled per sample (f: Finnish, i: Indian). In total 83 samples were used for 16S rRNA gene-based microbial profiling (Finnish: n=41 and Indian: n=42).
